# Supplementary material for: Reversible pH Responsive Bovine Serum Albumin Hydrogel Sponge Nanolayer
Source: PubMed Central journal article supplement (PMC7286146; doi:10.3389/fbioe.2020.00573), 2020-06-03
Supplement: Data_Sheet_1.pdf [file Data_Sheet_1.pdf]

## Supporting Information

# Reversible pH Responsive Bovine Serum Albumin Hydrogel Sponge Nanolayer

Vikram Singh Raghuwanshi, Brendan Yu, Christine Browne, Gil Garnier

*Bioresource Processing Research Institute of Australia (BioPRIA), Department of Chemical Engineering, Monash University, Clayton, Victoria, Australia*

**S1: Bare gold coated quartz sensor rinsed with the saline at different pH of 4.5 and 7.0.**

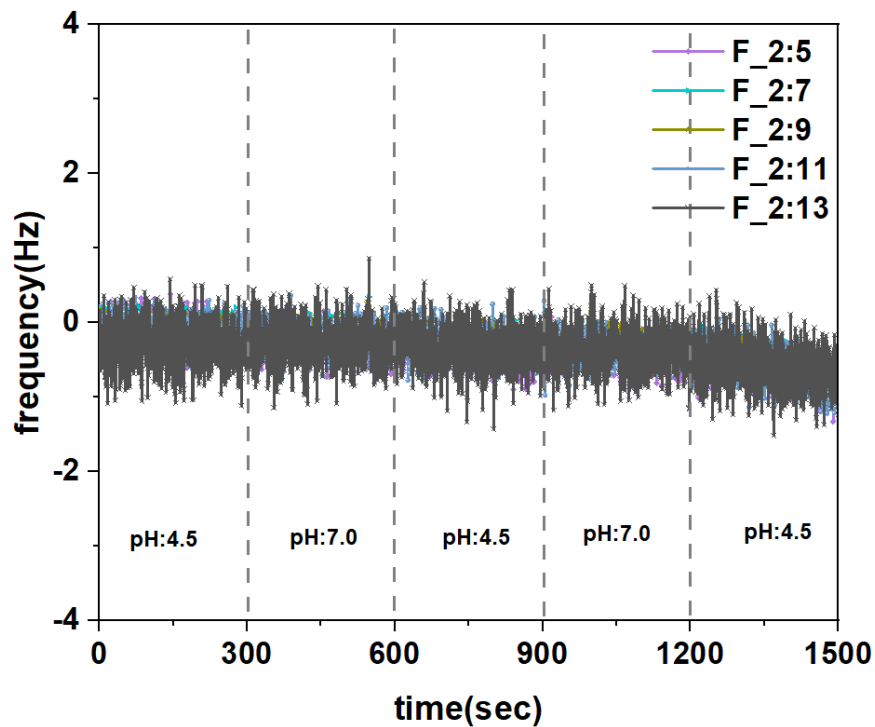

**S2: Dissipation of BSA adsorbed at pH 4.5 and 7.0 followed by saline rinse cycle at different pH.**

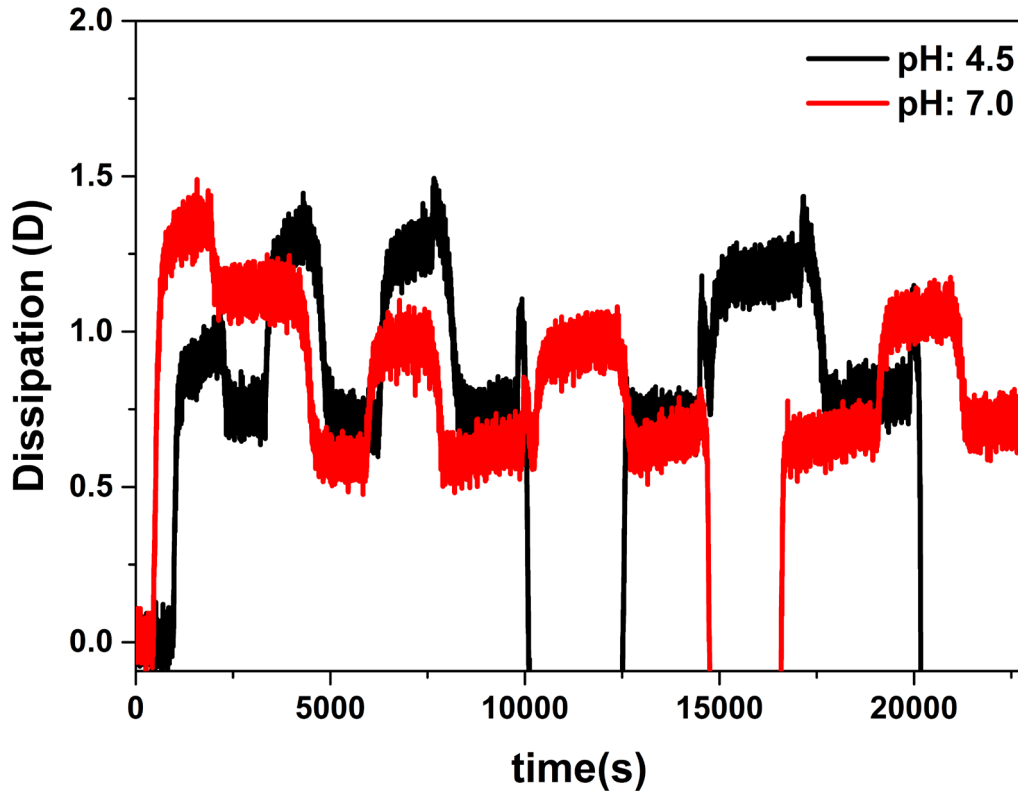

**S3: Calculation on BSA sorption at the gold interface**

**Calculated number of BSA molecules and adsorbed water per BSA molecule**

Calculated number of BSA molecules and adsorbed water per BSA molecule

BSA in 0.9% NaCl saline solution was made at a concentration of 1 mg/mL. The mass of a single BSA molecule is  $1.1 \times 10^{-16}$  mg (dry mass) and that of a single water molecule is  $2.99 \times 10^{-20}$  mg.

The number of BSA molecules from the wet mass of BSA ( $6.4 \text{ mg/m}^2$ ) at the sensor surface is calculated at pH 4.5 as:

$$6.4/1.1 \times 10^{-16} = 5.82 \times 10^{16} \text{ BSA molecules/m}^2$$

The number of adsorbed water molecules is evaluated from the difference of the mass with and without water molecules ( $1.0 \text{ mg/m}^2$ ):

$$1.0/2.99 \times 10^{-20} = 3.3 \times 10^{19} \text{ adsorbed water molecules/m}^2$$

This provides the number of water molecules attached/trapped per BSA molecule and is calculated as:

$$\text{Number of water molecules/BSA} = 3.3 \times 10^{19} / 5.8 \times 10^{16} = \mathbf{569 \text{ or } 570}$$

Similarly, the number of BSA molecules at the sensor surface is calculated at pH 7.0 as:

$$5.6/1.1 \times 10^{-16} = 5.1 \times 10^{16} \text{ BSA molecules/m}^2$$

$$\text{Number of Water molecules} = 0.7/2.99 \times 10^{-20} = 2.3 \times 10^{19} \text{ adsorbed water molecules}$$

$$\text{Number of water molecules/BSA} = 2.3 \times 10^{19} / 5.1 \times 10^{16} = \mathbf{450}$$

### **Relative number of BSA molecules adsorbed (dry mass) at the sensor**

BSA molecules have dimensions of 14 nm x 4 nm x 4 nm and modelling of the QCM-D data gives an average thickness of  $5.5 \pm 0.5$  nm. Therefore, it is likely that the BSA molecule retains in a lying conformation at the gold interface and forms a rigid monolayer (5 nm thick). Assuming that BSA molecules in the lying position cover the complete surface of the sensor, then the number of BSA molecules adsorbed is:

$$\text{Surface area of sensor of 1 cm in diameter} = \pi \times 0.5^2 = 0.8 \text{ cm}^2$$

$$\text{Surface area of a BSA molecule in a flay lying conformation} = 14 \text{ nm} \times 4 \text{ nm} = 56 \times 10^{-14} \text{ cm}^2$$

Therefore, the number of BSA molecule covering the complete surface of sensor is:

$$0.8/56 \times 10^{-14} = \mathbf{1.4 \times 10^{12} \text{ molecules}}$$

$$\text{Or BSA molecules/m}^2 = 1.4 \times 10^{12}/0.8 \times 10^{-4} = 1.75 \times 10^{16} \text{ molecules/m}^2$$

The weight of a BSA molecules determined as:

$$\text{BSA molecular weight: } 66400 \text{ g/mol}$$

$$1 \text{ mole of BSA} = 66400 \text{ g}$$

$$6.023 \times 10^{23} \text{ molecules of BSA} = 66400 \text{ g}$$

$$1 \text{ molecules of BSA} = 1.1 \times 10^{-19} \text{ g or } 1.1 \times 10^{-16} \text{ mg}$$

The total mass of adsorbed BSA on sensor surface (1 cm in diameter) is:

$$1.1 \times 10^{-19} \text{ g} \times 1.4 \times 10^{12} \text{ molecules} = 1.5 \times 10^{-7} \text{ g OR } \mathbf{0.15 \mu\text{g}}$$

The BSA mass adsorb per unit area of sensor:

$$0.15 \times 10^{-3} \text{ mg} / 0.8 \times 10^{-4} \text{ m}^2 = \mathbf{1.9 \text{ mg/m}^2}$$
